# Supplementary material
Source: Springer Nature journal article supplement (https://www.springermedizin.de/resource/supplementary/12889_2013_7527_MOESM2_ESM.pdf/9498420)

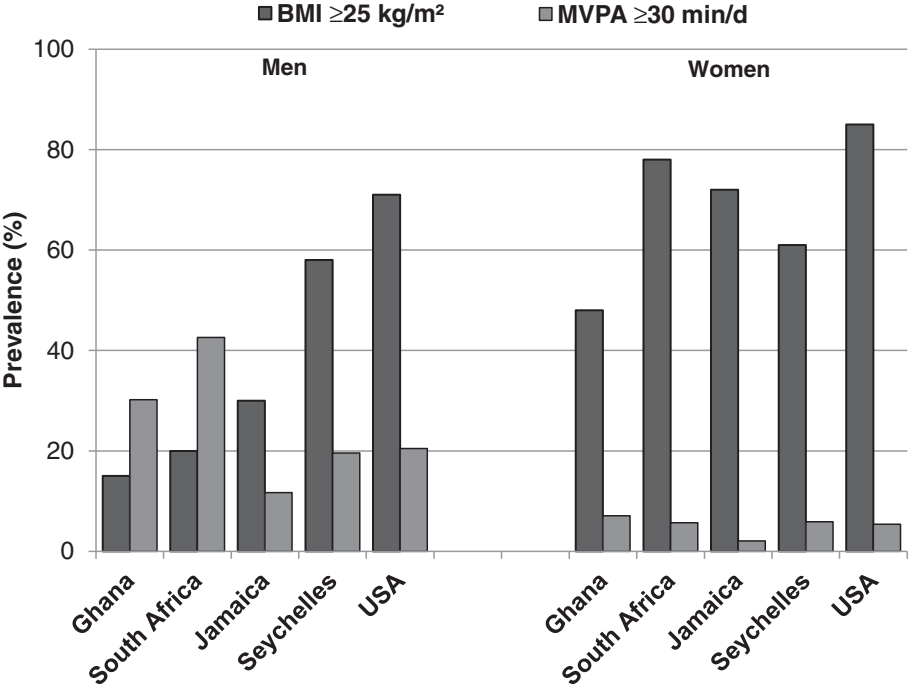

Supplement: MOESM2 [file 9498420]
